# Supplementary material for: Astrocyte as Spatiotemporal Integrating Detector of Neuronal Activity
Source: PubMed Central journal article supplement (PMC6482266; doi:10.3389/fphys.2019.00294), 2019-04-18
Supplement: Table_1.pdf [file Table_1.pdf]

**Table 1. The parameter values used in the model**

| <b>Parameter</b> | <b>Definition</b>                                                                                                             | <b>Value</b>                                                                                        | <b>References</b> |
|------------------|-------------------------------------------------------------------------------------------------------------------------------|-----------------------------------------------------------------------------------------------------|-------------------|
| $g_{Na}$         | Conductivity of Na current                                                                                                    | 120 mS/sm <sup>2</sup>                                                                              | [1]               |
| $g_K$            | Conductivity of K current                                                                                                     | 36 mS/sm <sup>2</sup>                                                                               | [1]               |
| $g_{leak}$       | Leakage current conductivity                                                                                                  | 0.3 mS/sm <sup>2</sup>                                                                              | [1]               |
| $V_{Na}$         | Reversible Na potential                                                                                                       | 55 mV                                                                                               | [1]               |
| $V_K$            | Reversible K potential                                                                                                        | -77 mV                                                                                              | [1]               |
| $V_{leak}$       | Reversible leakage potential                                                                                                  | -54.4 mV                                                                                            | [1]               |
| $C$              | Specific membrane capacity                                                                                                    | 1 $\mu$ F/sm <sup>2</sup>                                                                           | [1]               |
| $I_{app}$        | Current simulating constant membrane depolarization                                                                           | 4.5 $\mu$ A/sm <sup>2</sup>                                                                         | [1, 2]            |
| $\alpha_G$       | Neurotransmitter clearance constant                                                                                           | 0.1 ms <sup>-1</sup>                                                                                | [3]               |
| $\alpha_I$       | Rate constant of EPSCs                                                                                                        | 0.1 ms <sup>-1</sup>                                                                                | [3]               |
| $k_{pre}$        | The efficacy of neurotransmitter release                                                                                      | 3.9                                                                                                 | [3]               |
| $b$              | Scaling factor of gamma-distribution                                                                                          | 20                                                                                                  | [3]               |
| $k_0$            | The efficacy of neurotransmitter release without astrocytic impact                                                            | 3.9                                                                                                 | [3]               |
| $b_0$            | Scaling factor of gamma-distribution without astrocytic impact                                                                | 20                                                                                                  | [3]               |
| $\gamma_1$       | Presynaptic feedback gain describing the influence of astrocytic glutamate on the average amount of released neurotransmitter | 0.1, -0.4 for potentiation and for depression of presynaptic neurotransmitter release, respectively | [3]               |
| $\gamma_2$       | Postsynaptic feedforward gain describing the influence of astrocytic D-serine on EPSCs amplitudes                             | 1                                                                                                   | [3]               |
| $\theta_G$       | Midpoint of neuronal activation                                                                                               | 0.2                                                                                                 | [3]               |
| $k_G$            | Slope of neuronal activation                                                                                                  | 0.05                                                                                                | [3]               |
| $v_1$            | Max Ca <sup>2+</sup> channel flux                                                                                             | 6 s <sup>-1</sup>                                                                                   | [4,5]             |
| $v_2$            | Ca <sup>2+</sup> leak flux constant                                                                                           | 0.11 s <sup>-1</sup>                                                                                | [4,5]             |
| $v_3$            | Max Ca <sup>2+</sup> uptake                                                                                                   | 2.2 $\mu$ M s <sup>-1</sup>                                                                         | [4,5]             |
| $k_3$            | Activation constant for ATP-Ca <sup>2+</sup> pump                                                                             | 0.1 $\mu$ M                                                                                         | [4,5]             |
| $a_2$            | Ca <sup>2+</sup> inhibition constant                                                                                          | 0.2 s <sup>-1</sup>                                                                                 | [4,5]             |
| $d_1$            | Dissociation constant for IP <sub>3</sub>                                                                                     | 0.13 $\mu$ M                                                                                        | [4,5]             |
| $d_2$            | Dissociation constant for Ca <sup>2+</sup> inhibition                                                                         | 1.049 $\mu$ M                                                                                       | [4,5]             |
| $d_3$            | Receptor dissociation constant for IP <sub>3</sub>                                                                            | 0.9434 $\mu$ M                                                                                      | [4,5]             |
| $d_5$            | Ca <sup>2+</sup> activation constant                                                                                          | 0.082 $\mu$ M                                                                                       | [4,5]             |
| $v_\beta$        | Maximal rate of IP <sub>3</sub> production by                                                                                 | 63 $\mu$ M s <sup>-1</sup>                                                                          | [6]               |

|                 | PLC $\beta$                                                        |                                  |       |
|-----------------|--------------------------------------------------------------------|----------------------------------|-------|
| $K_r$           | Glutamate affinity of the receptor                                 | 1.3 $\mu\text{M}$                | [6]   |
| $K_p$           | Ca <sup>2+</sup> /PKC-dependent inhibition factor                  | 10 $\mu\text{M}$                 | [6]   |
| $K_\pi$         | Ca <sup>2+</sup> affinity of PKC                                   | 0.6 $\mu\text{M}$                | [6]   |
| $v_\delta$      | Maximal rate of IP <sub>3</sub> production by PLC $\delta$         | 0.02 $\mu\text{M s}^{-1}$        | [6]   |
| $K_\delta$      | Inhibition constant of PLC $\delta$ activity                       | 1.5 $\mu\text{M}$                | [6]   |
| $K_{PLC\delta}$ | Ca <sup>2+</sup> affinity of PLC $\delta$                          | 0.1 $\mu\text{M}$                | [6]   |
| $v_{3K}$        | Maximal rate of degradation by IP <sub>3</sub> -3K                 | 2 $\mu\text{M s}^{-1}$           | [6]   |
| $K_D$           | Ca <sup>2+</sup> affinity of IP <sub>3</sub> -3K                   | 0.7 $\mu\text{M}$                | [6]   |
| $K_3$           | IP <sub>3</sub> affinity of IP <sub>3</sub> -3K                    | 1 $\mu\text{M}$                  | [6]   |
| $r_{5p}$        | Maximal rate of degradation by IP-5P                               | 0.04 $\text{s}^{-1}$             | [6]   |
| $\alpha_1$      | Clearance constant of glutamate released from astrocyte            | 10 $\text{ms}^{-1}$              | [3]   |
| $\alpha_2$      | Clearance constant of D-serine released from astrocyte             | 10 $\text{ms}^{-1}$              | [3]   |
| $[Ca_c]_{th}$   | Threshold intracellular calcium concentration for gliotransmission | 0.19 $\mu\text{M}$               | [9]   |
| $k_{1,2}$       | Slope of activation function $H_{1,2}(X)$                          | 0.01                             | [3]   |
| $D_{Ca}$        | Coefficient of Ca <sup>2+</sup> diffusion                          | 30 $\mu\text{m}^2/\text{s}$      | [10]  |
| $D_{IP3}$       | Coefficient of IP <sub>3</sub> diffusion                           | 300 $\mu\text{m}^2/\text{s}$     | [10]  |
| $d_{CaER}$      | Coefficient of Ca <sup>2+</sup> diffusion in ER                    | 0.001 $\text{s}^{-1}$            | [10]  |
| $F$             | Faraday constant                                                   | 96485 C/mol                      |       |
| $r_{ER}$        | Ratio of the volume of ER to the volume of cytoplasm               | 0.15-0.05 see Table 2            | [7,8] |
| $r$             | Radius of the astrocytic compartment                               | 0.25-8 $\mu\text{m}$ see Table 2 | [7,8] |
| $l$             | Unit length                                                        | 1 $\mu\text{m}$                  |       |

[1] (Izhikevich, 2007)

[2] (Kazantsev, Asatryan 2011)

[3] (Gordleeva et al., 2012)

[4, 5] (De Young & Keizer, 1992; Li & Rinzel, 1994)

[6] (De Pitta M et al., 2009)

[7, 8] (Oschmann et al., 2017, Patrushev et al., 2013).

[9] (Parpura & Haydon, 2000)

[10] (Kang & Othmer, 2009)

**Table 2. Geometry of the astrocytic model**

| Compartment number (Fig. 2A), N | Value $r_{ER}$ | Value $r$ , $\mu\text{m}$ |
|---------------------------------|----------------|---------------------------|
| Soma, 0                         | 0.15           | 8                         |
| 1, 9, 14, 19, 25, 33, 39        | 0.1            | 4                         |

|                                               |      |      |
|-----------------------------------------------|------|------|
| 2, 6, 10, 15, 20, 26, 28, 34,<br>40, 47       | 0.09 | 3    |
| 3, 5, 7, 8, 11, 16, 21, 27, 29,<br>35, 48, 41 | 0.08 | 2    |
| 4, 12, 17, 22, 30, 36, 42, 49,<br>50          | 0.07 | 1    |
| 13, 18, 23, 31, 37, 43, 51,<br>52             | 0.06 | 0.5  |
| 24, 32, 38, 44, 45, 46                        | 0.05 | 0.25 |
